# Supplementary material
Source: publisher figshare collection journal article supplement (https://tandf.figshare.com/ndownloader/files/22838444)
Supplement: Supplementary file 1 [file 22838444]

**Appendix A**

*The final data set*

2014

- “Women are being assaulted, abused and murdered in a sea of misogyny” <https://www.theguardian.com/lifeandstyle/womens-blog/2014/sep/12/women-being-assaulted-abused-murdered-misogny>
- “When ‘Hello Darling’ turns violent”

<https://www.theguardian.com/lifeandstyle/womens-blog/2014/aug/29/mary-brandon-beaten-groped-notting-hill-carnival>

- “Everyday Sexism in freshers week: the fightback starts here” <https://www.theguardian.com/lifeandstyle/womens-blog/2014/sep/19/everyday-sexism-in-freshers-week-student-university>

2015

- “#Itaintrape: six misconceptions about sexual violence” <https://www.theguardian.com/lifeandstyle/womens-blog/2015/jan/09/itaintrape-hastag-six-misconceptions-sexual-violence>
- “why should women run the gauntlet of harassment while out jogging?” <https://www.theguardian.com/lifeandstyle/womens-blog/2015/aug/20/why-should-women-run-the-gauntlet-of-harassment-while-out-jogging>
- “Harassed by your boss at the Christmas part? You’re not alone” <https://www.theguardian.com/lifeandstyle/womens-blog/2015/dec/22/harassed-by-your-boss-christmas-party-not-alone>

2016

- “How video pranksters are cashing in on the abuse and harassment of women” <https://www.theguardian.com/lifeandstyle/2016/jun/02/how-video-pranksters-are-cashing-in-on-the-abuse-and-harassment-of-women>
- “Portugal has made street harassment a crime- why hasn’t the UK?” <https://www.theguardian.com/lifeandstyle/womens-blog/2016/feb/25/portugal-has-made-street-harassment-a-why-hasnt-the-uk>
- “Wolf-whistling is no crime – but it is part of our misogynistic culture” <https://www.theguardian.com/commentisfree/2016/jul/14/wolf-whistling-hate-crime-misogyny-nottinghamshire-police>
